# Supplementary material for: Laboratory Risk Assessment of Three Entomopathogenic Fungi Used for Pest Control toward Social Bee Pollinators
Source: MDPI journal article supplement (doi:10.3390/microorganisms10091800), 2022-09-07
Supplement: s1 [file s1]

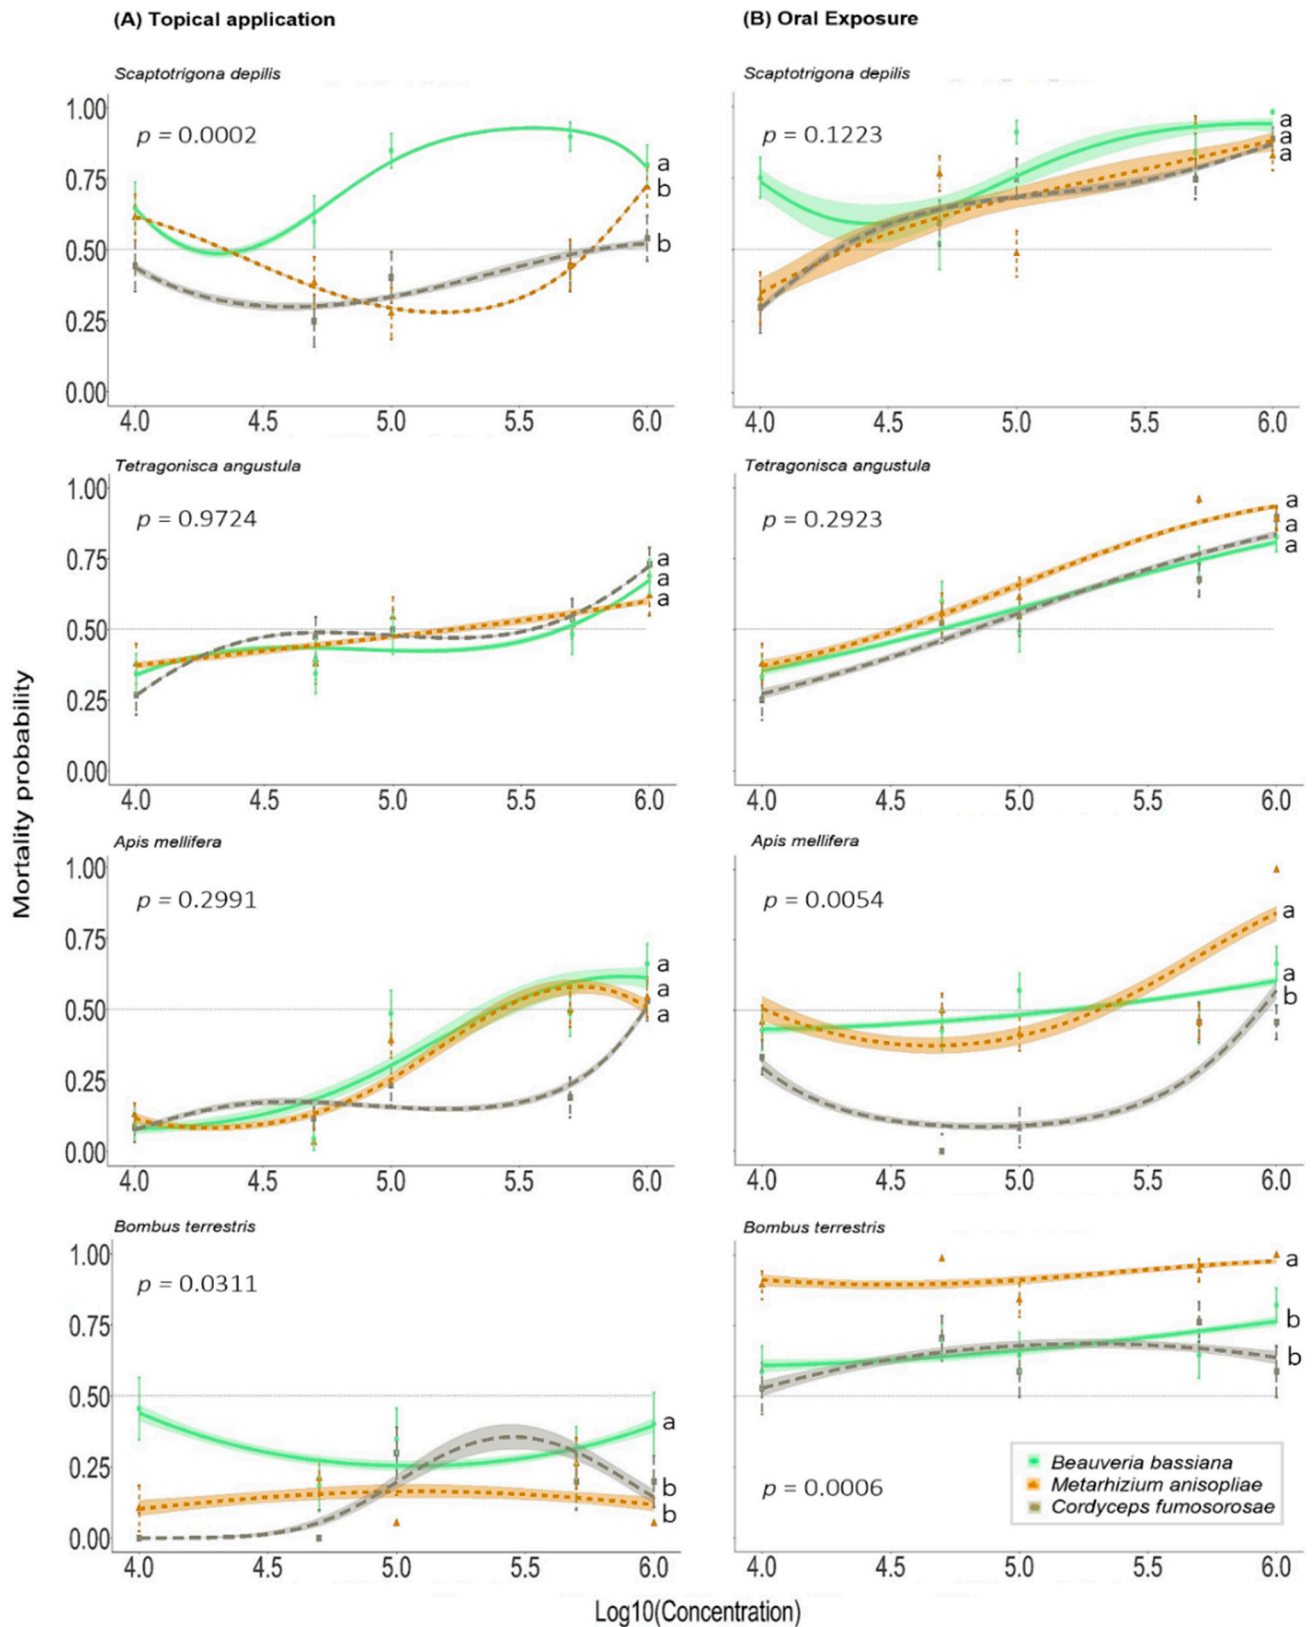

**Figure S1.** Corrected mortality probability of *Scaptotrigona depilis*, *Tetragonisca angustula*, *Apis mellifera* and *Bombus terrestris* workers by the entomopathogenic fungi *Beauveria bassiana*, *Metarhizium anisopliae* and *Cordyceps fumosorosea* by (A) topical and (B) oral exposures. The concentrations (conidia mL<sup>-1</sup>) were transformed by regression Log10: 4.0 = 5 × 10<sup>5</sup>, 4.5 = 1 × 10<sup>6</sup>, 5.0 = 5 × 10<sup>6</sup>, 5.5 = 1 × 10<sup>7</sup>, 6.0 = 5 × 10<sup>7</sup>. Different letters compare the mean mortality of all concentrations and indicate that there was significant difference between the results ( $p < 0.05$ ).
